# Supplementary material
Source: publisher figshare collection journal article supplement (https://acs.figshare.com/ndownloader/files/28201451)
Supplement: Supplementary file 1 [file 28201451]

# Supporting Information

## Lotus Seedpod Inspiration: Particle-Nested Double-Inverse- Opal Film with Fast and Reversible Structural Color Switching for Information Security

Changtong Zhou, Yong Qi, Shufen Zhang\*, Wenbin Niu, Suli Wu, Wei Ma, and Bingtao Tang

State Key Laboratory of Fine Chemicals, Dalian University of Technology, Dalian 116024, China

\*E-mail: zhangshf@dlut.edu.cn

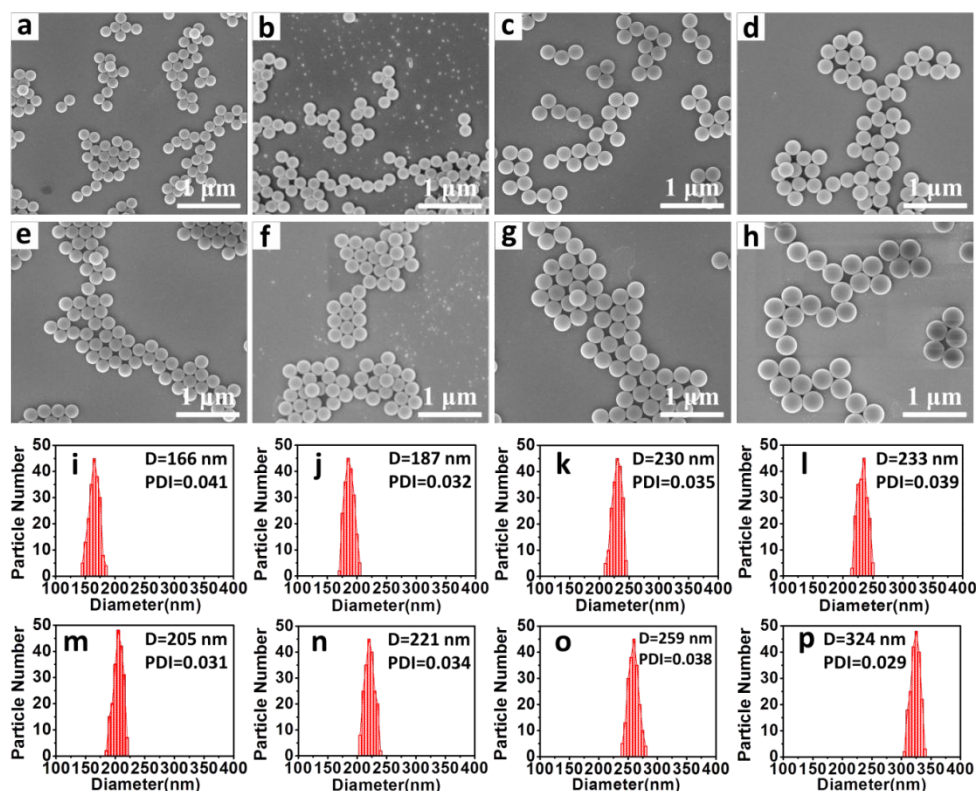

**Figure S1.** SEM images of the prepared PS microspheres and PS@SiO<sub>2</sub> core-shell microspheres. Particle size distribution diagrams of obtained microspheres via counting 200 nanospheres in the corresponding SEM images (a-h). The PDI and D in the figures in (i-p) represent the particle size distribution index and average particle size, respectively.

**Table S1.** Diameters and Zeta-potential of prepared microspheres.

| Sample              | Size (nm) <sup>a</sup> | PDI <sup>b</sup> | Zeta potential (mV) <sup>c</sup> |
|---------------------|------------------------|------------------|----------------------------------|
| PS                  | 166                    | 0.041            | -43.7                            |
| PS                  | 187                    | 0.032            | -48.5                            |
| PS                  | 230                    | 0.035            | -45.6                            |
| PS                  | 233                    | 0.039            | -49.8                            |
| PS@SiO <sub>2</sub> | 205                    | 0.031            | -39.2                            |
| PS@SiO <sub>2</sub> | 221                    | 0.034            | -46.3                            |
| PS@SiO <sub>2</sub> | 259                    | 0.038            | -42.5                            |
| PS@SiO <sub>2</sub> | 324                    | 0.029            | -47.4                            |

a: The particle diameters of prepared colloidal microspheres were obtained by counting 200 microspheres in the corresponding SEM images. b and c: Corresponding PDI and Zeta-potential of prepared microspheres were characterized by Dynamic Light Scattering.

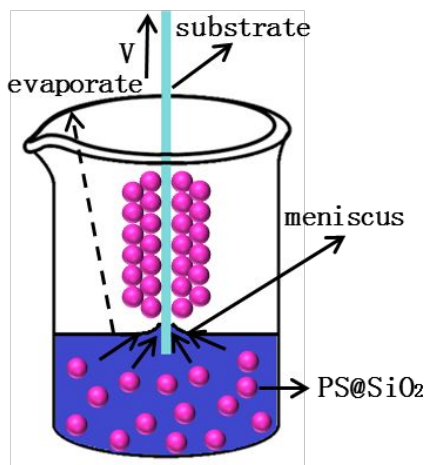

**Figure S2.** Schematic illustration of the dip-coating method.

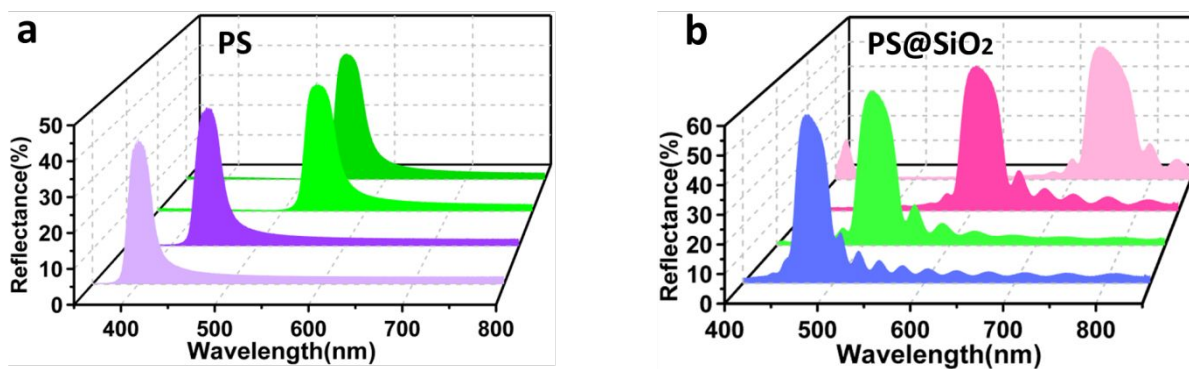

**Figure S3.** Reflection spectra of prepared PC templates (a, PS; b, PS@SiO<sub>2</sub>).

Based on Bragg-Snell's law<sup>1</sup>, the PBG of FCC structured PS PCs could be theoretically calculated as:

$$\lambda_{\max} = 1.633D(n_{\text{avg}}^2 - \sin^2\theta)^{1/2} \quad (1)$$

$$n_{\text{avg}}^2 = 0.74 \times n_{\text{PS}}^2 + 0.26 \times n_{\text{air}}^2 \quad (2)$$

Where  $\lambda_{\max}$  represents the maximum reflected wavelength,  $D$  is the diameter of PS microspheres,  $n_{\text{avg}}$  represents the effective refractive index,  $\theta$  is the incident angle; here  $n_{\text{PS}} = 1.59$  and  $n_{\text{air}} = 1.0$ . Through a simple formula transformation, the theoretical diameter of the prepared PS microspheres can be calculated by the corresponding PBGs based on the following formula:

$$D = \lambda_{\max} / [1.63 \times (2.13 - \sin^2\theta)^{1/2}] \quad (3)$$

For FCC structured PS@SiO<sub>2</sub> PCs, the PBG of could be theoretically calculated based on the following formul<sup>2</sup>:

$$\lambda_{\max} = 1.633D(n_{\text{avg}}^2 - \sin^2\theta)^{1/2} \quad (1)$$

$$n_{\text{avg}}^2 = 0.74 \times n_{\text{core-shell}}^2 + 0.26 \times n_{\text{air}}^2 \quad (4)$$

$$n_{\text{core-shell}} = n_{\text{core}} X_{\text{core}} + n_{\text{shell}} X_{\text{shell}} \quad (5)$$

Where  $\lambda_{\max}$  is the maximum reflected wavelength,  $D$  represents the diameter of PS@SiO<sub>2</sub> core-shell microspheres,  $n_{\text{avg}}$  is the effective refractive index,  $\theta$  is the incident angle; here  $n_{\text{core}}$  and  $n_{\text{shell}}$  are the refractive indexes of each component,  $n_{\text{core}} = n_{\text{PS}} = 1.59$ ,  $n_{\text{shell}} = n_{\text{silica}} = 1.46$ ,

and  $n_{\text{air}} = 1.0$ ;  $X_{\text{core}}$  and  $X_{\text{shell}}$  are the corresponding volume fractions in the PS@SiO<sub>2</sub> core-shell microspheres, respectively. The theoretical diameter of the prepared PS@SiO<sub>2</sub> core-shell microspheres can be calculated by the corresponding PBGs based on the above formulas.

**Table S2.** The diameter of the PS@SiO<sub>2</sub> microspheres (theoretical and practical)

|                     | $\lambda_{\text{max}}$ (nm) | $\theta$ (°) | Theoretical D (nm) | Practical D (nm) |
|---------------------|-----------------------------|--------------|--------------------|------------------|
| PS                  | 400                         | 5            | 168                | 166              |
| PS                  | 441                         | 5            | 185                | 187              |
| PS                  | 540                         | 5            | 227                | 230              |
| PS                  | 552                         | 5            | 232                | 233              |
| PS@SiO <sub>2</sub> | 471                         | 5            | 204                | 205              |
| PS@SiO <sub>2</sub> | 509                         | 5            | 220                | 221              |
| PS@SiO <sub>2</sub> | 605                         | 5            | 260                | 259              |
| PS@SiO <sub>2</sub> | 733                         | 5            | 322                | 324              |

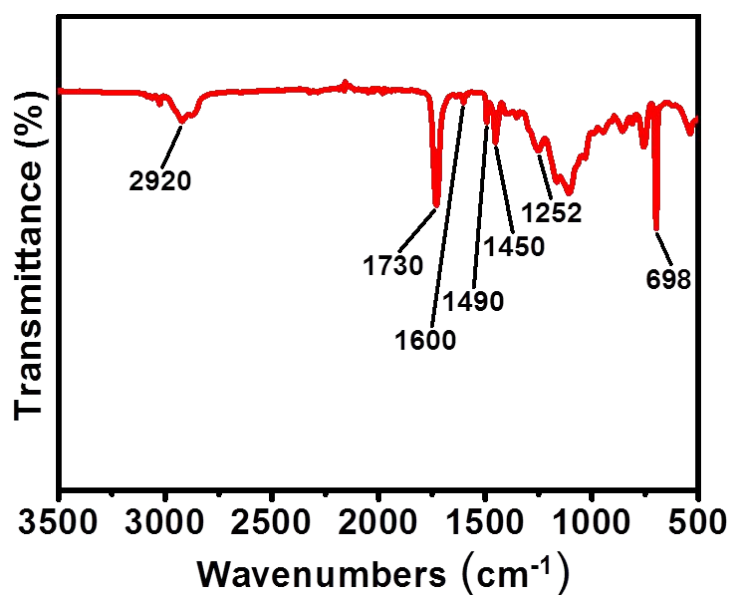

**Figure S4.** FT-IR spectra of the obtained DIOPC film.

PS: 2920  $\text{cm}^{-1}$  ( $\nu$  C-H aliphatic); 1600, 1490, and 1450  $\text{cm}^{-1}$  ( $\nu$  C-C framework of the benzene ring), 698  $\text{cm}^{-1}$  ( $\delta$  single replace of Benzene). Polymer backbone: 1730  $\text{cm}^{-1}$  ( $\nu$  C=O) and 1252  $\text{cm}^{-1}$  ( $\nu$  C-O-C).

**Table S3.** Physical parameters of the liquids used to verify the infiltration response of the patterned sample from nonwetted to wetted states.

| Name          | Molecular formula                | Refractive index | Surface tension (mN/m) |
|---------------|----------------------------------|------------------|------------------------|
| Water         | H <sub>2</sub> O                 | 1.33             | 72.8                   |
| Formamid      | HCONH <sub>2</sub>               | 1.45             | 58.2                   |
| Diiodomethane | CH <sub>2</sub> I <sub>2</sub>   | 1.74             | 50.8                   |
| Ethanol       | C <sub>2</sub> H <sub>5</sub> OH | 1.36             | 22.1                   |

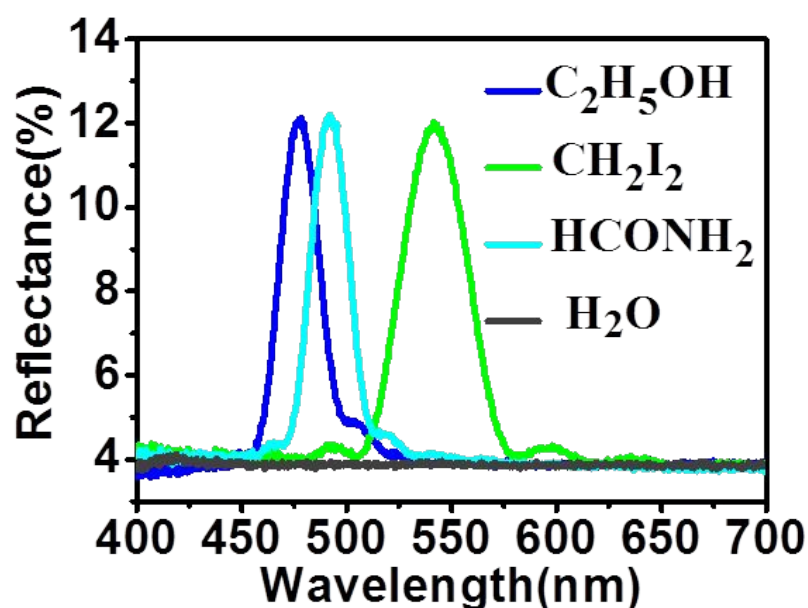

**Figure S5.** Corresponding reflection spectra of Figure 2d.

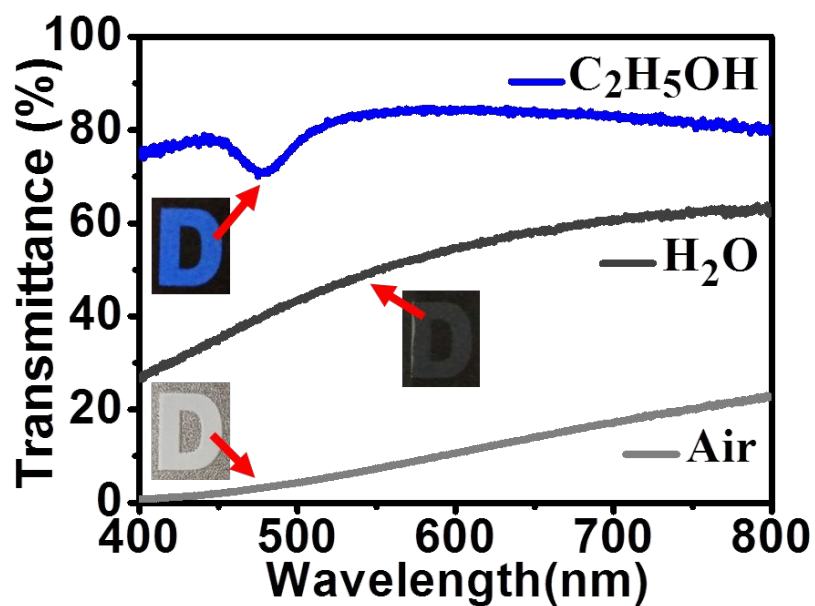

**Figure S6.** Transmission spectra of the prepared patterned DIOPC film with a letter “D” in the air or wiped with water or ethanol.

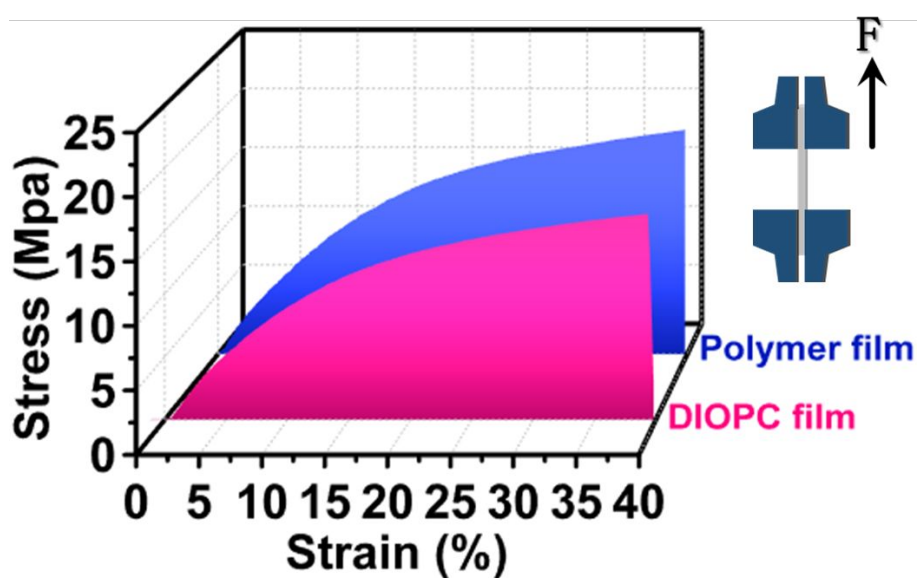

**Figure S7.** Tensile strain curves of the pure polymer film and the DIOPC film; the inset is the schematic diagram of the tensile test.

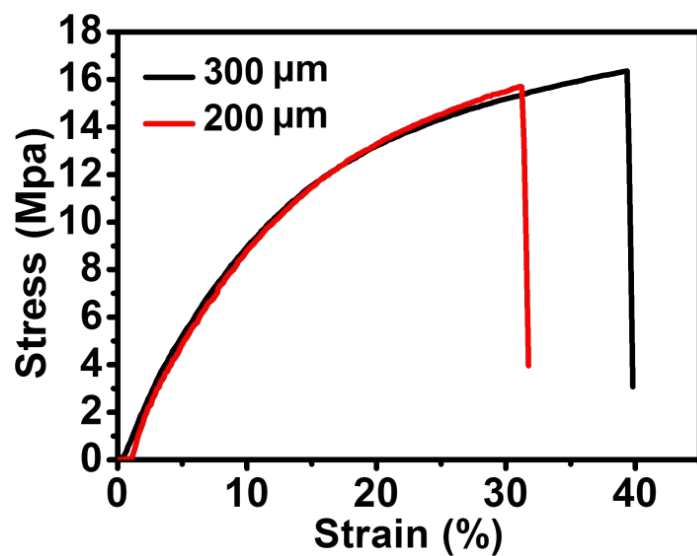

**Figure S8.** Tensile strain curves of the DIOPC film prepared with different thicknesses.

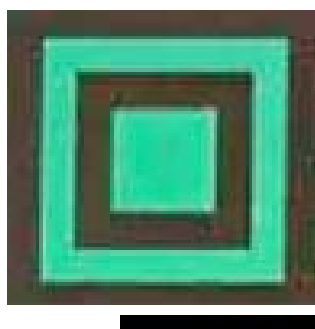

**Figure S9.** The pattern obtained by using the Fiber Laser Marking Machine. The scale bar in the inset is 0.5 cm.

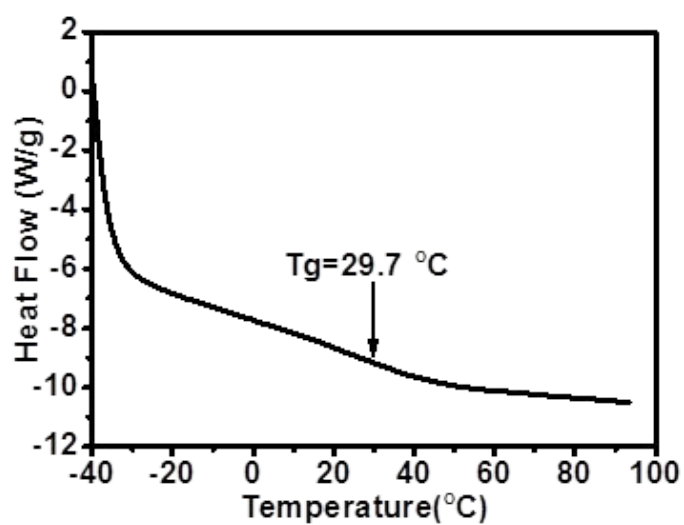

**Figure S10.** The DSC curve of the prepared BDIOPC film.



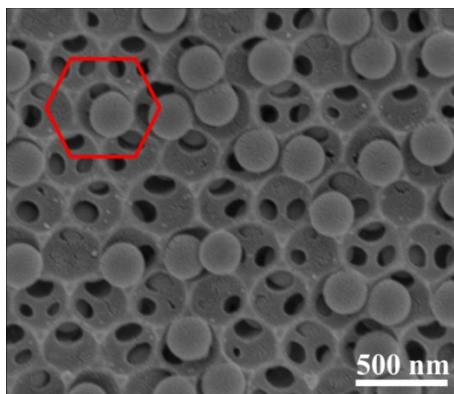

**Figure S11.** Cross-sectional SEM image of the close-up view of the top layer.

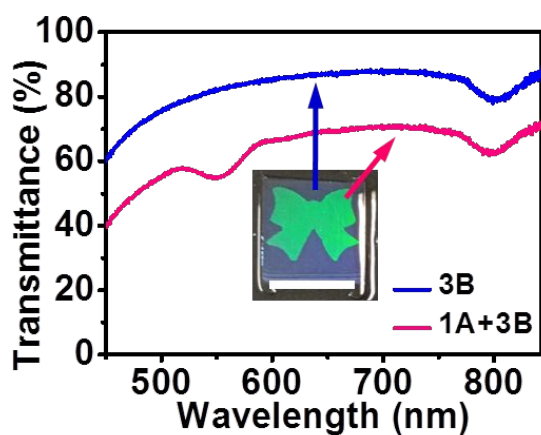

**Figure S12.** Transmission spectra of the prepared BDIOPC film sample wiped with ethanol both the top layer and bottom layer (3B represents the single top layer at 3B thickness and 1A+3B represents the whole BDIOPC film); inset is the photo of the BDIOPC film with a bowknot and the scale bar in the inset is 2 cm.

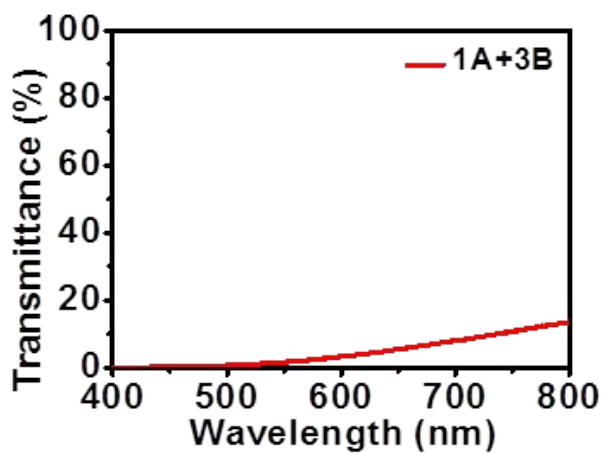

**Figure S13.** Transmission spectrum of the prepared BDIOPC film.

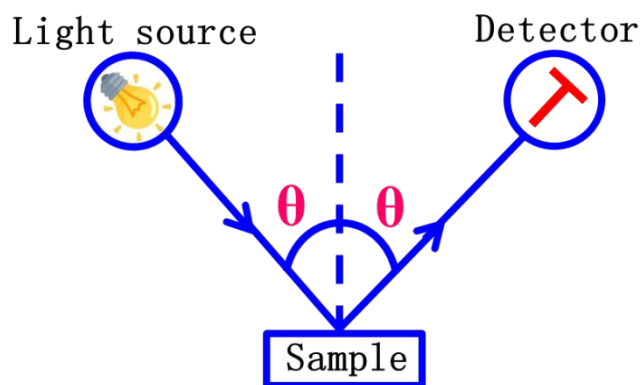

**Figure S14.** The diagram of the specular reflection model.

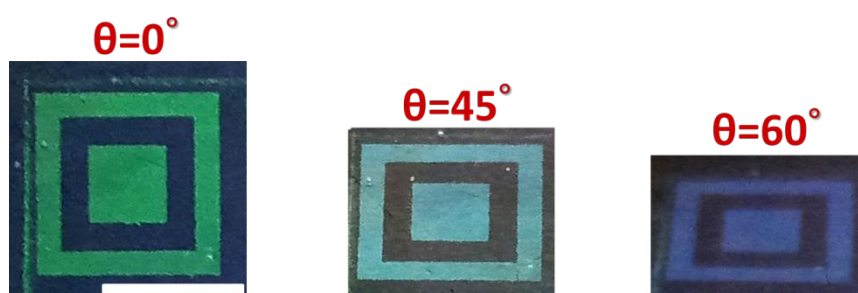

**Figure S15.** Digital photos of the patterned BDIOPC film at different viewing angles after the ethanol response. The scale bar in the inset is 0.5 cm.

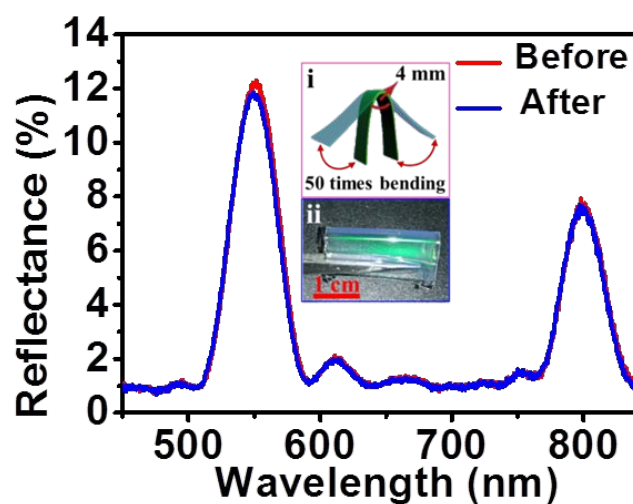

**Figure S16.** Reflectance spectra of the prepared BDIOPC film before and after 50 bending tests; insets are the schematic of the bending test and the obtained digital photo of the bent BDIOPC film.

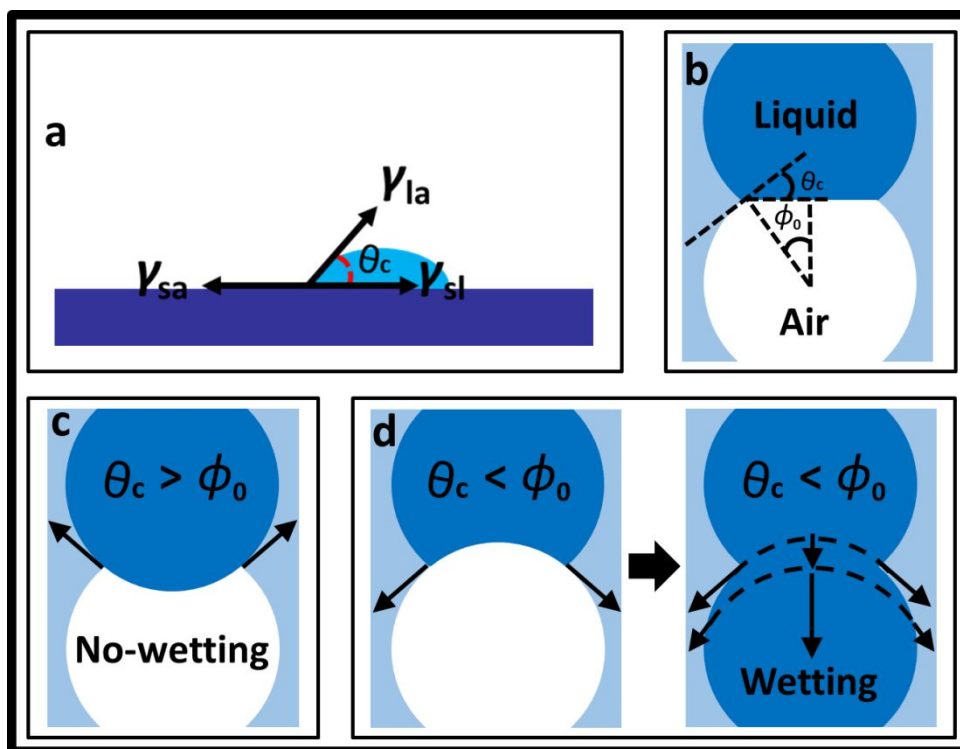

**Figure S17.** (a) Schematic diagram of the contact angle of the liquid on the solid surface ( $\gamma_{sa} - \gamma_{sl} = \gamma_{la} \cos\theta_c$ , where  $\theta_c$  is the measured contact angle,  $\gamma_{sa}$ ,  $\gamma_{sl}$ , and  $\gamma_{la}$  are the solid-air, solid-liquid, and liquid-air surface tensions, respectively). (b) Schematic of the liquid front propagating at the neck of two connected balls of the inverse opal structure (where  $\theta_c$  indicates the measured contact angle of the liquid on the inverse opal structure surface,  $\phi_0$  is the azimuthal angle). (c) Schematic illustration of the no-wetting state (if  $\theta_c > \phi_0$ , no infiltration occurs). (d) Schematic illustration of the wetting state (if  $\theta_c < \phi_0$ , infiltration occurs).

|                               | Top layer |       |       |       |       |       |       |       |       |      |
|-------------------------------|-----------|-------|-------|-------|-------|-------|-------|-------|-------|------|
| Ethanol concentrations (v/v%) | 0         | 5     | 10    | 15    | 20    | 25    | 27.5  | 30    | 32.5  | 100  |
| Contact angle                 | 50.2°     | 42.8° | 38.0° | 34.1° | 31.3° | 26.9° | 23.0° | 18.6° | 13.5° | 1.5° |

  

|                               | Bottom layer |       |       |       |       |       |       |       |       |      |
|-------------------------------|--------------|-------|-------|-------|-------|-------|-------|-------|-------|------|
| Ethanol concentrations (v/v%) | 0            | 5     | 10    | 15    | 20    | 22.5  | 25    | 27.5  | 30    | 100  |
| Contact angle                 | 47.0°        | 40.1° | 36.2° | 33.0° | 28.9° | 26.9° | 25.5° | 20.0° | 16.0° | 1.2° |

**Figure S18.** Contact angles of different concentrations of ethanol on the surface of the obtained BDIOPC film.

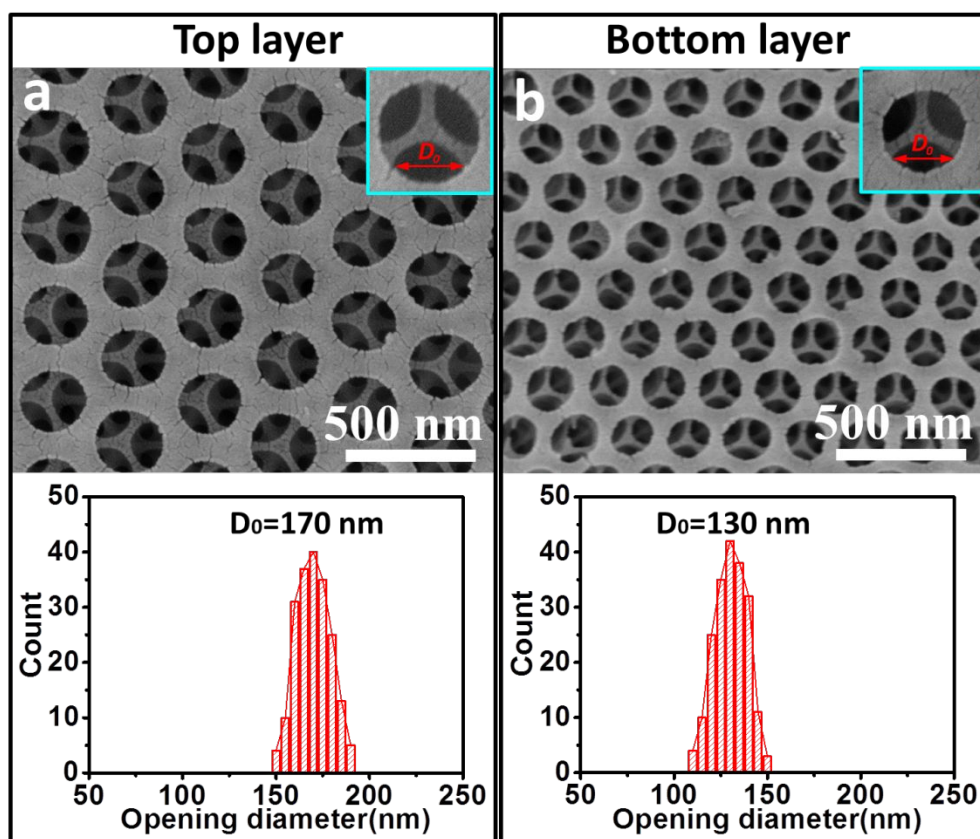

**Figure S19.** SEM images of the top view of the treated BDIOPC film with toluene (a, the top layer; b, the bottom layer; the PS spheres inside the pores of the BDIOPC film were removed) and corresponding opening diameter distribution diagrams.

## References

- (1) Aguirre, C. I.; Reguera, E.; Stein, A. Tunable Colors in Opals and Inverse Opal Photonic Crystals. *Adv. Funct. Mater.* **2010**, *20*, 2565-2578.
- (2) Zhong, K.; Song, K.; Clays, K. Hollow Spheres: Crucial Building Blocks for Novel Nanostructures and Nanophotonics. *Nanophotonics*. **2018**, *7*, 693-713.
